# Supplementary material
Source: ML conference proceedings conference paper supplement (https://openreview.net/forum?id=9eT2pA9P-vI)
Supplement: supplementary_material [file attachment]

In src, we provide the source code for BERT and ResNet training with Adam and AdamA. If you want to launch the training, you should include the path of the BERT corpus and cifar100 or ImageNet datasets in these codes. We provide the launching scripts below.

## BERT

```
BERT_Large pretraining with Adam:
cd ./src/BERT
source BERTLarge_Adam_pretrain.sh

BERT_Large pretraining with AdamA:
cd ./src/BERT
source BERTLarge_AdamA_pretrain.sh

BERT_Large finetune:
cd ./src/BERT
source BERTLarge_finetune_run.sh
```

## ResNet

```
ResNet50 single device training with Adam:
cd ./src/ResNet/SingleDevice
source ResNet_Adam.sh

ResNet50 single device training with AdamA:
cd ./src/ResNet/SingleDevice
source ResNet_AdamA.sh

ResNet50 DDP training with Adam:
cd ./src/ResNet/DDP
source ResNet_Adam.sh

ResNet50 DDP training with AdamA:
cd ./src/ResNet/DDP
source ResNet_AdamA.sh
```
